# Supplementary material for: Tailoring defect structure and dopant composition and the generation of various color characteristics in Eu3+ and Tb3+ doped MgF2 phosphors
Source: Royal Society of Chemistry journal article supplement (doi:10.1039/d2cp01031c), 2022-01-01
Supplement: d2cp01031c1.pdf [file d2cp01031c1.pdf]

## Tailoring defect's structure and dopant's composition in $\text{Eu}^{3+}$ & $\text{Tb}^{3+}$ doped $\text{MgF}_2$ phosphors in order to generate a wide range of color characteristics

Sumanta Mukherjee<sup>a</sup>, Nimai Pathak<sup>b\*</sup>, Kawsar Ali<sup>c</sup>, Debarati Das<sup>a</sup>, Dhanadeep Dutta<sup>ad</sup>,

<sup>a</sup>Fuel Chemistry Division, Bhabha Atomic Research Centre, Mumbai, 400085, India

<sup>b</sup>Radiochemistry Division, Bhabha Atomic Research Centre, Mumbai, 400085, India

<sup>c</sup>Glass and Advanced Materials Division, Bhabha Atomic Research Centre, Mumbai, 400085, India

<sup>d</sup>Homi Bhabha National Institute, Mumbai-400085, India

\*Email: [nmpathak4@gmail.com](mailto:nmpathak4@gmail.com), [nimai@barc.gov.in](mailto:nimai@barc.gov.in)

Telephone-+91-22-25590715/0636

Fax-+91-22-25405151

### Instrumentation:

#### X-Ray diffraction (XRD)

An X-ray diffractometer (Proto x-ray diffraction system) has been used to characterised all the powder samples using  $\text{CuK}_\alpha$  ( $\lambda = 1.5406$  and  $1.5444 \text{ \AA}$ ) monochromatic radiation as X-ray radiation source. All the XRD patterns were recorded within the  $2\theta$  range of  $10\text{-}70$  with a step width of  $0.02$  and scan rate of  $5\text{ s}$ . The samples were spread uniformly on the sample holder and then covered with scotch tape and sealing with plastic wrap in order to avoid exposure to the air during the XRD measurement.

#### Infrared study

We have used a Bruker Platinum ATR FTIR spectrometer to record the FTIR spectra of all the compounds in the spectral range  $2000\text{-}500 \text{ cm}^{-1}$ .

#### Photoluminescence study (PL)

An Edinburgh CD-920 unit with M 300 monochromator has been used to record the PL spectra of all the compounds. We have used F-900 software provided by Edinburgh Analytical Instruments, UK for the data acquisition and analysis. A Xenon flash with a frequency of  $100 \text{ Hz}$  has been used as excitation source to record the emission, excitation, and lifetime spectra. To minimize the peak intensity fluctuation and to maximize S/N ratio, we have taken at least five scans for each of the spectrum. The well-established Time-correlated single-photon counting (TCSPC) technique has been used to perform the lifetime study for the compounds.

#### Positron Annihilation Lifetime Spectroscopy (PALS) study

We have carried out the PALS measurements for all the powder compounds at room temperature using  $^{22}\text{Na}$  as positron source ( $\sim 10 \mu\text{Ci}$ ) and two  $\text{BaF}_2$  scintillation detectors connected to a fast-fast coincidence system. At first the positron source was deposited in a thin Kapton foil and then this was kept inside the powder sample in an aluminum vial. The

vial was kept between two BaF<sub>2</sub> detectors. We measured a resolving time of 250 ps for the positron window settings with <sup>60</sup>Co source and the time calibration was 12.5 ps/channel. For each measurement, the spectrum with approximately 2 x 10<sup>6</sup> counts was acquired. We have used the PALSFIT analysis program to analyze all the data.

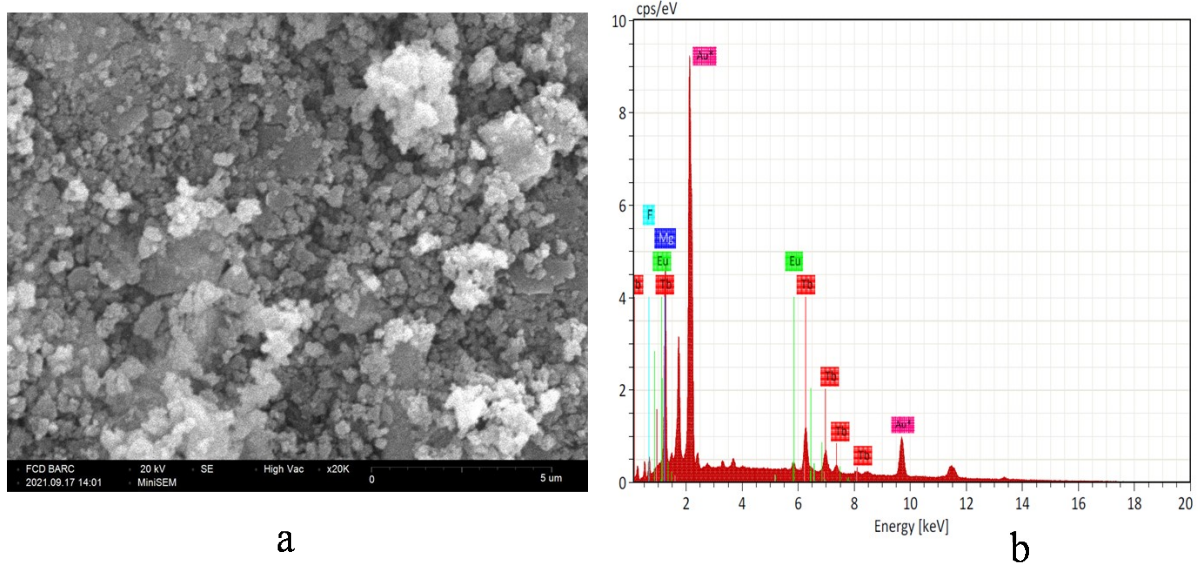

**Figure S1.** (a) SEM and (b) EDX spectra of Tb<sub>0.5</sub>Eu<sub>0.5</sub>:MF

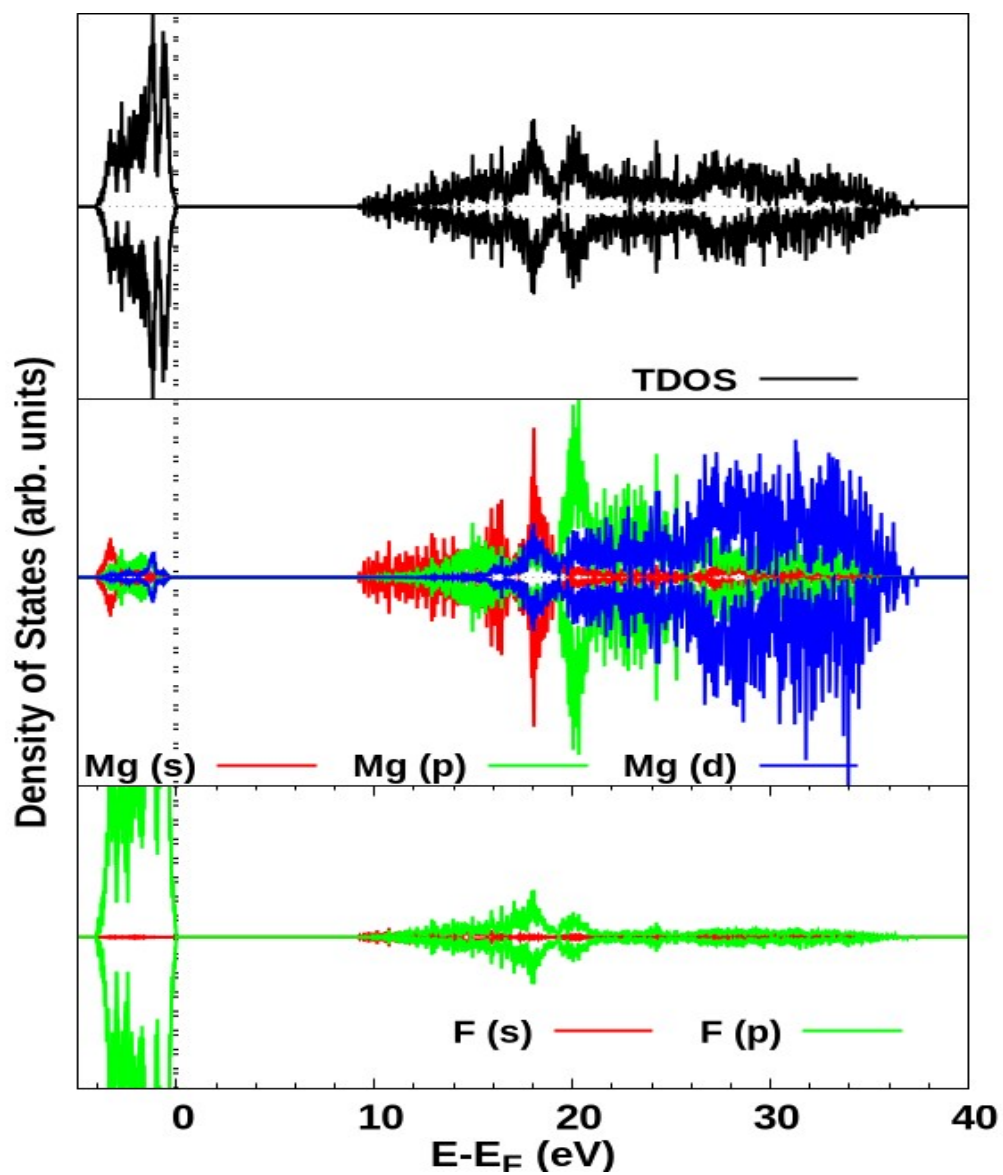

Figure S2. Total density of states (DOS) and l-projected partial DOS of pristine MgF<sub>2</sub>

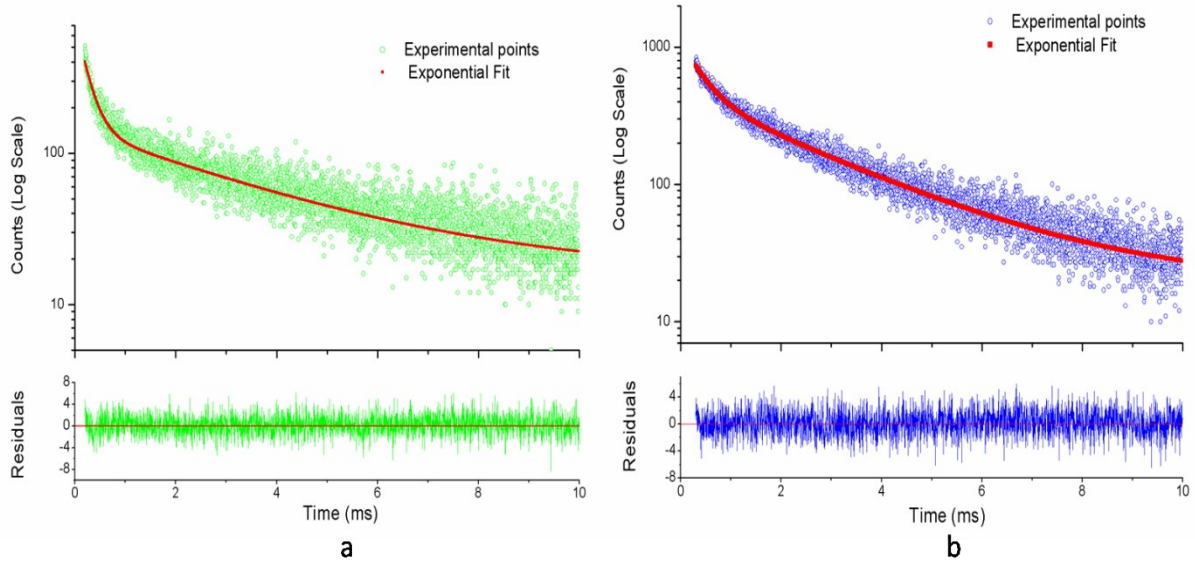

**Figure S3:** Photoluminescence decay profile of  $\text{Eu}_{0.5}\text{Tb}_{0.5}:\text{MgF}_2$   $\lambda_{\text{ex}}=233$  nm excitation and (a) 545 nm (b) 615 nm emission wavelengths.

**Table S1:** Crystallographic parameters of  $\text{MgF}_2$

| Space Group                     | Wyckoff position |      |       |       |     |           |
|---------------------------------|------------------|------|-------|-------|-----|-----------|
|                                 | Atom             | Site | x     | y     | z   | occupancy |
| $P42/mnm$ (136)<br>(Tetragonal) | Mg               | 2a   | 0.0   | 0.0   | 0.0 | 1.0       |
|                                 | F                | 4f   | 0.304 | 0.304 | 0.0 | 1.0       |

**Table S2:** Lattice parameters and volume of the pristine and Eu and Eu and Tb co-doped  $\text{MgF}_2$ .

| Phase                 | Lattice parameters (Å)                                                                       | Volume (Å <sup>3</sup> ) |
|-----------------------|----------------------------------------------------------------------------------------------|--------------------------|
| $\text{MgF}_2$        | a=4.680 (4.6912)[43] ,<br>4.625[44] 4.621[45]<br>c=3.083 (3.096) [43] 3.052[44]<br>3.052[45] | 67.542                   |
| Eu: $\text{MgF}_2$    | a=4.720, c=3.106                                                                             | 69.178                   |
| Tb: $\text{MgF}_2$    | a=4.726, c=3.110                                                                             | 69.457                   |
| Eu,Tb: $\text{MgF}_2$ | a=4.744, c=3.131                                                                             | 70.474                   |

**Table S3:** Theoretically calculated positron lifetime in MgF<sub>2</sub>:

| System                                                                                                                                                                                    | Calculated Lifetime (ps) |
|-------------------------------------------------------------------------------------------------------------------------------------------------------------------------------------------|--------------------------|
| <b>UndopedMgF<sub>2</sub>[33]</b>                                                                                                                                                         |                          |
| Bulk                                                                                                                                                                                      | 204.8                    |
| Mg monovacancy $V_{Mg}''$                                                                                                                                                                 | 227.1                    |
| Mg divacancy $2V_{Mg}''$                                                                                                                                                                  | 234.3                    |
| A vacancy cluster created by removing four neighboring Mg atoms and associated eight F atoms ( <b>VC1</b> )                                                                               | 397.8                    |
| A vacancy cluster created by removing five neighboring Mg atoms and associated ten F atoms ( <b>VC2</b> )                                                                                 | 440.9                    |
| <b>Tb<sup>3+</sup> doped MgF<sub>2</sub> system</b>                                                                                                                                       |                          |
| $Tb_{Mg}\dot{}$ (charge not balanced)                                                                                                                                                     | 204.2                    |
| $Tb_{Mg}\dot{}$ + $V_{Mg}''$ + $V_F\dot{}$ (charge balanced)                                                                                                                              | 279.9                    |
| <b>Li<sup>+</sup> and Tb<sup>3+</sup> doped MgF<sub>2</sub> system</b>                                                                                                                    |                          |
| Bulk                                                                                                                                                                                      | 205.1                    |
| $Tb_{Mg}\dot{}$ + $Li_{Mg}\dot{}$                                                                                                                                                         |                          |
| $Tb_{Mg}\dot{}$ + $Li_{Mg}\dot{}$ + VC1<br>( Here the VC1 cluster remains intact)                                                                                                         | 398.2                    |
| $Tb_{Mg}\dot{}$ + $Li_{Mg}\dot{}$ + VC2<br>( Here the VC2 cluster remains intact)                                                                                                         | 442.1                    |
| Tb <sup>3+</sup> and Li <sup>+</sup> replace two Mg atoms within the <b>VC1</b> cluster and the cluster contains only four $V_F\dot{}$ to maintain the required charge balanced condition | 284.5                    |
| Tb <sup>3+</sup> and Li <sup>+</sup> replace two Mg atoms within the <b>VC2</b> cluster and the cluster contains only six $V_F\dot{}$ to maintain the required charge balanced condition  | 266.5                    |
| <b>Eu<sup>3+</sup> and Tb<sup>3+</sup> doped MgF<sub>2</sub> system</b>                                                                                                                   |                          |
| $Eu_{Mg}\dot{}$ + $Tb_{Mg}\dot{}$ + $V_{Mg}''$                                                                                                                                            | 227.8                    |
| $Eu_{Mg}\dot{}$ + $Tb_{Mg}\dot{}$ + $2V_{Mg}''$                                                                                                                                           | 234.7                    |
| $Eu_{Mg}\dot{}$ + $Tb_{Mg}\dot{}$ + $V_{Mg}''$ + VC1<br>( Here the VC1 cluster remains intact)                                                                                            | 428.6                    |
| $Eu_{Mg}\dot{}$ + $Tb_{Mg}\dot{}$ + $V_{Mg}''$ + VC2<br>( Here the VC2 cluster remains intact)                                                                                            | 538.3                    |
| Eu <sup>3+</sup> and Tb <sup>3+</sup> replace two Mg atoms within the <b>VC1</b> cluster and the cluster contains only two                                                                | 269.2                    |

|                                                                                                                                                                                          |       |
|------------------------------------------------------------------------------------------------------------------------------------------------------------------------------------------|-------|
| $V_{\bar{F}}$ to maintain the required charge balanced condition                                                                                                                         |       |
| Eu <sup>3+</sup> and Tb <sup>3+</sup> replace two Mg atoms within the VC2 cluster and the cluster contains only four<br>$V_{\bar{F}}$ to maintain the required charge balanced condition | 270.5 |
